# Supplementary material for: The inhibitory effect of ABA on floral transition is mediated by ABI5 in Arabidopsis
Source: PubMed Central journal article supplement — J Exp Bot. 2013 Jan 31;64(2):675–84. doi: 10.1093/jxb/ers361 (PMC3542054; doi:10.1093/jxb/ers361), 2013-01-31
Supplement: supp_ers361_jexbot088997_file001.pdf [file supp_ers361_jexbot088997_file001.pdf]

**The inhibitory effect of ABA on floral transition is mediated by ABI5 in *Arabidopsis***

**Yanping Wang, Lin Li, Tiantian Ye, Yuming Lu, Xi Chen, Yan Wu\***

## Supplementary Data

Supplementary Figures:

Fig. S1

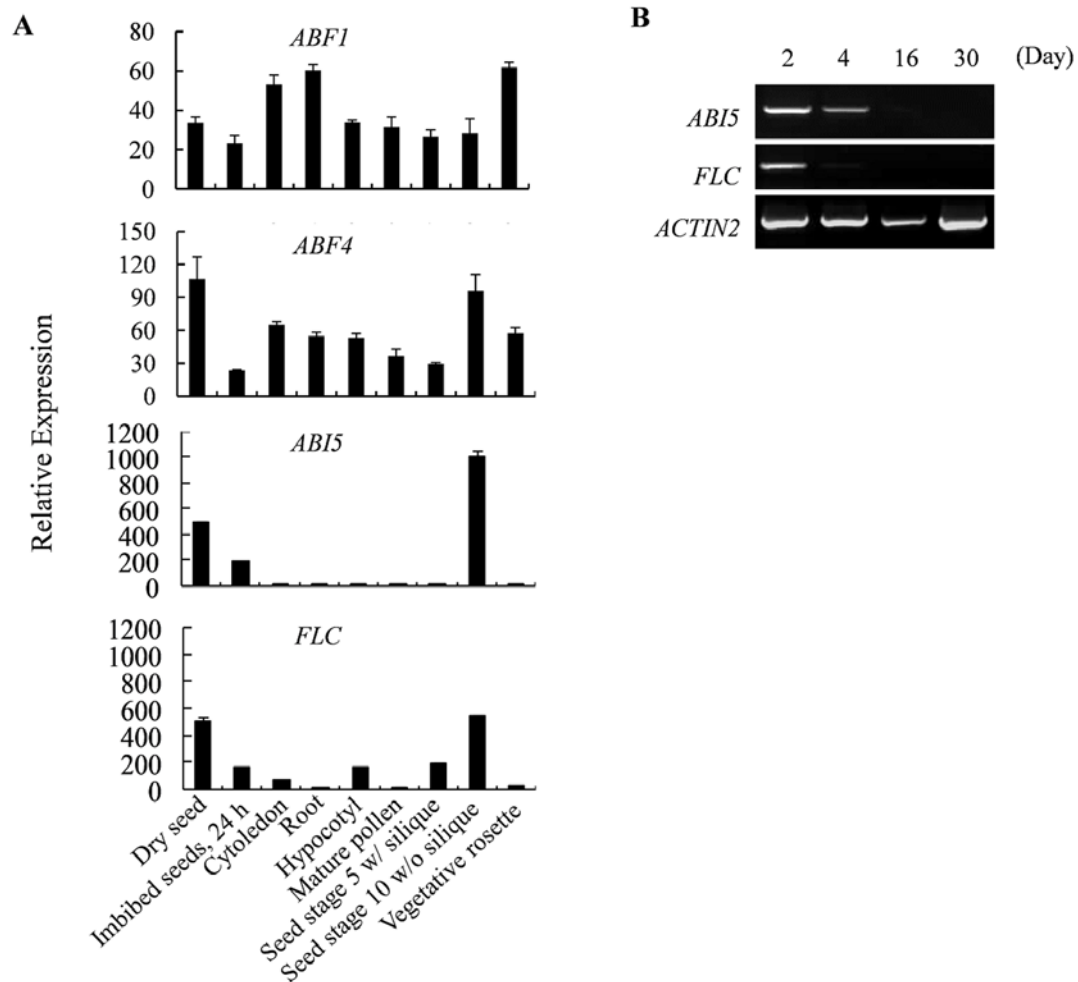

**Supplementary Fig. S1.** Comparisons of *ABFs*, *ABI5* and *FLC* expression patterns in *Arabidopsis*. (A) Public available microarray data illustrating similar expression patterns of *ABF1*, *ABF4*, *ABI5* and *FLC* in various tissues of *Arabidopsis* (<http://bar.utoronto.ca/efp/cgi-bin/efpWeb.cgi>). (B) Comparative analyses of *ABI5* and *FLC* in Col seedlings (2, 4, 16, or 30 represents the day-of-germination). Expression level of *ACTIN2* represents the loading control.

Fig. S2

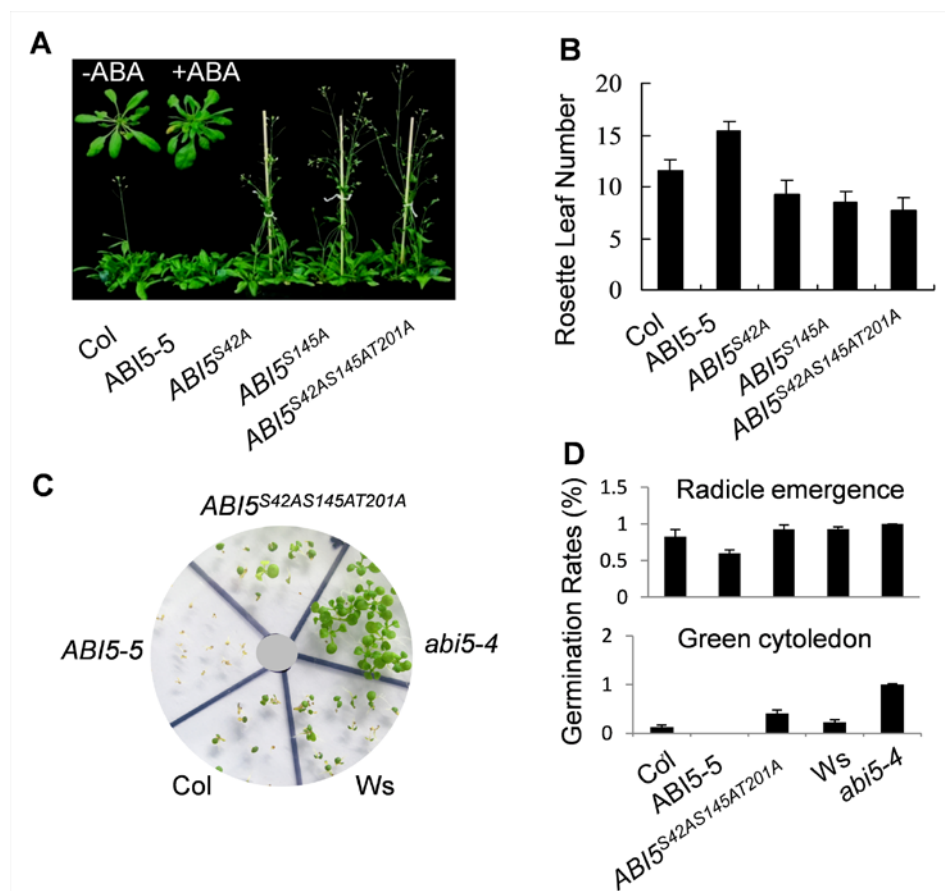

**Supplementary Fig. S2.** (A) Comparisons of the flowering phenotype in 40-day-old seedlings (under long-day growth condition). Insert: ABA (100  $\mu$ M) treated Col seedlings. (B) Comparisons of total rosette leaf numbers. Data represent the means  $\pm$  SEs of three replicated experiments ( $n > 20$ , each). (C) The seed germination phenotype was analyzed in indicated lines on ABA (1.0  $\mu$ M) plate. Photo was taken at the 7th day after imbibitions. (D) Seed germination rates were quantified at the 7th day after imbibitions. Data represent the means  $\pm$  SEs of three replicated experiments ( $n > 30$ , each).

Fig. S3

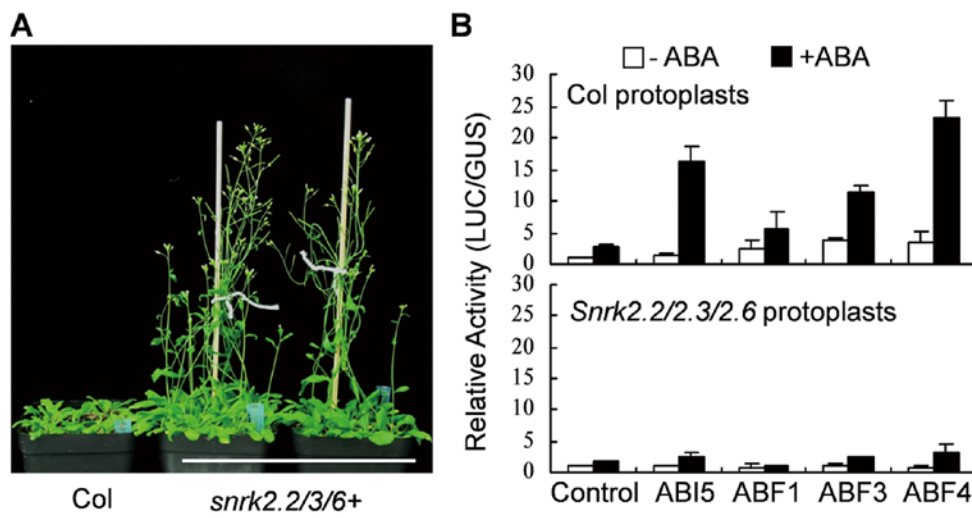

**Supplementary Fig. S3.** SnRK2s are involved in regulations on *FLC* expression. (A) Early flowering phenotype of *snrk2.2/3/6+* triple mutant plants. Photo was taken after plants were growing for 35 days under the long day condition. (B) The transactivation of *FLC* by ABFs was dependent upon SnRK2s. Data represent means  $\pm$  SDs of three replicated experiments. ABA (50  $\mu$ M); Control (ethanol).

Fig. S4

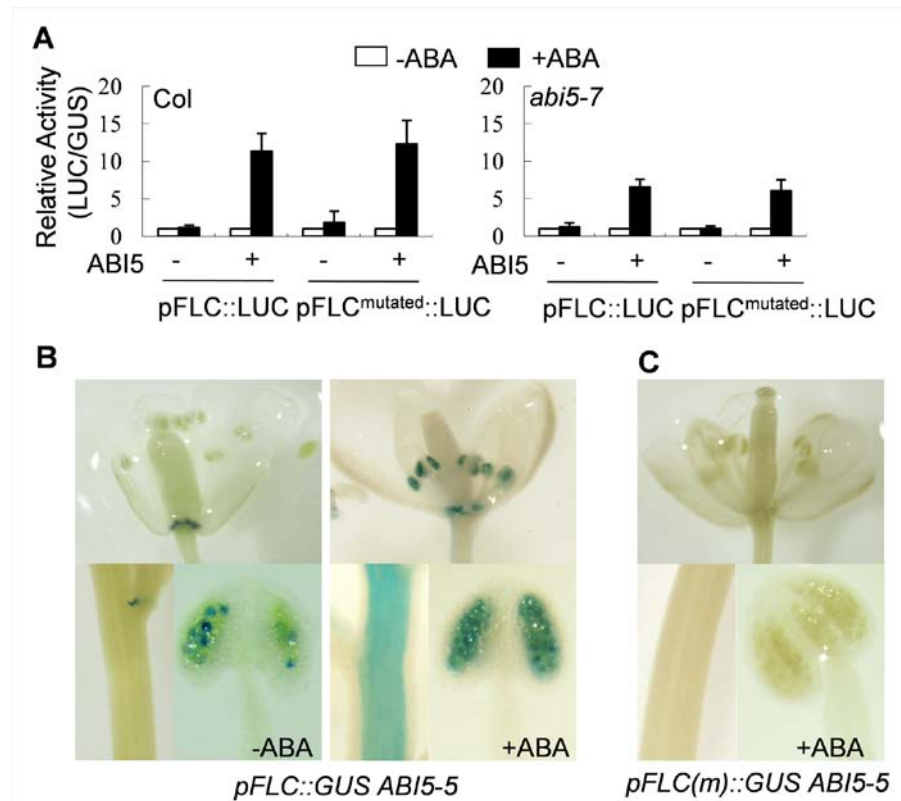

**Supplementary Fig. S4.** ABRE-like and G-box motifs in FLC promoter are essential for FLC expression in responding to ABA. (A) ABI5 effect on FLC promoter activity was compared between the wild-type FLC promoter (pFLC::LUC) and the mutated FLC promoter (pFLCmutated::LUC). The mutation was created only at the ABRE-like element. Data represent means  $\pm$  SEs of three replicated experiments. (B) & (C) ABA-induced GUS signal was analyzed in the plants of *pFLC::GUS ABI5-5* (B) and *pFLC(m)::GUS ABI5-5* (C) transgenic lines. The GUS signal was analyzed after treated with 100  $\mu$ M ABA for 3 hours. Mutations created at ABRE-like element and G-box motifs (indicated as pFLC(m)::GUS) in *FLC* promoter showed no GUS signal.

## Supplementary Tables:

Table S1

**Table S1. The primers for identification of *snrk2.2/2.3/2.6* homozygous plants.**

|                |                                                                                      |
|----------------|--------------------------------------------------------------------------------------|
| <i>SnRK2.2</i> | LP: 5'-CATGCCATGGAGATGGATCCGGCGACTAAT-3'<br>RP: 5'-GGAATTCTCAGAGAGCATAAACTATCTCTC-3' |
| <i>SnRK2.3</i> | LP: 5'-CATGCCATGGAGATGGATCGAGCTCCGGTG-3'<br>RP: 5'-GGAATTCTTAGAGAGCGTAACTATCT-3'     |
| <i>SnRK2.6</i> | LP: 5'-CATGCCATGGAGATGGATCGACCAGCAGTG-3'<br>RP: 5'-GGAATTCTCACATTGCGTACACAATCT-3'    |

Table S2

**Table S2. The primers for plasmids construction in this study.**

|                               |                                                                                             |
|-------------------------------|---------------------------------------------------------------------------------------------|
| ABF1-GFP                      | F: 5'-CCGCTCGAGATGGGTACTCACATTGATA-3'<br>R: 5'-GGGGTACCTCCCCTTCTTACCACGGACCG-3'             |
| ABF3-GFP                      | F: 5'-CCGCTCGAGATGGGGTCTAGATTAAGT-3'<br>R: 5'-GGGGTACCTCCCCTGGCGCAGAGGCTCCA-3'              |
| ABF4-GFP                      | F: 5'-CCGCTCGAGATGGGAACTCACATCAAT-3'<br>R: 5'-GGGGTACCTCCCCTGGTCCGGTTAATG-3'                |
| ABI5-HA                       | F: 5'-CCGCTCGAGTCCGGCGGCTTTTAACTAT-3'<br>R: 5'-TCCCCGCGTTAAGCGTAATCTGGAACATCGT-3'           |
| ABI5-GFP                      | F: 5'-CCGCTCGAGTCCGGCGGCTTTTAACTAT-3'<br>R: 5'-CCGCTCGAGGAGTGGACAACCTCGGGTTCC-3'            |
| ABI5 <sup>S42A</sup> -HA/GFP  | F: 5'-AGACAATCCGCTATCTACTC-3'<br>R: 5'-GAGTAGATAGcGGATTGTCT-3'                              |
| ABI5 <sup>S145A</sup> -HA/GFP | F: 5'-CGACAAGGCGCTTTGACACT-3'<br>R: 5'-AGTGTCAAAGCGCCTTGTCG-3'                              |
| ABI5 <sup>T201A</sup> -HA/GFP | F: 5'-AGACAACCGGCTTTTGGAGA-3'<br>R: 5'-TCTCCAAAAGCCGGTTGTCT-3'                              |
| p35S::GFP-FLC                 | F: 5'-TCTTTAATTAAAGCCATGGGAAGAA-3'<br>R: 5'-TCAGAGCTCGATTAAAGGTGGCTAA-3'                    |
| pFLC::LUC                     | F: 5'-AACTGCAGTATTCGTGTTGCAAAATCGTAAA-3'<br>R: 5'-CATGCCATGGGGCTTCTCTCCGAGAGG-3'            |
| pFLC(m)::LUC                  | F: 5'-AGACGCTCGTCGGGGGTACAAAAGGCAATCTTGTCTT-3'<br>R: 5'-AACAGAAGTTTTGTGTGGGGGAATAAGTGTAT-3' |
| p35S::SnRK2.6                 | F: 5'-CCCGGATGGATCGACCAGCAGTGAGT-3'<br>R: 5'-ACTAGTCTCACATTGCGTACACAATC-3'                  |

Table S3

**Table S3. The plasmids information in this study.**

| Plasmids Names                            | Cloning Sites | Vectors    | References                |
|-------------------------------------------|---------------|------------|---------------------------|
| ProUBQ10-GUS                              | HindIII/BamHI | Pro35S-GUS | Wu <i>et al.</i> , 1997   |
| pBA-ABI5-HA                               | XhoI/SacI     | pBA002     | Kost <i>et al.</i> , 1998 |
| pBA-ABI5 <sup>S42A</sup> -HA              | XhoI/SacI     | pBA002     | Kost <i>et al.</i> , 1998 |
| pBA-ABI5 <sup>S145A</sup> -HA             | XhoI/SacI     | pBA002     | Kost <i>et al.</i> , 1998 |
| pBA-ABI5 <sup>S42AS145AT201A</sup> -HA    | XhoI/SacI     | pBA002     | Kost <i>et al.</i> , 1998 |
| p35S::ABI5-GFP                            | XhoI/KpnI     | pGFP2      | Kost <i>et al.</i> , 1998 |
| p35S::ABI5 <sup>S42A</sup> -GFP           | XhoI/KpnI     | pGFP2      | Kost <i>et al.</i> , 1998 |
| p35S::ABI5 <sup>S145A</sup> -GFP          | XhoI/KpnI     | pGFP2      | Kost <i>et al.</i> , 1998 |
| p35S::ABI5 <sup>S42AS145A</sup> -GFP      | XhoI/KpnI     | pGFP2      | Kost <i>et al.</i> , 1998 |
| p35S::ABI5 <sup>S42AS145AT201A</sup> -GFP | XhoI/KpnI     | pGFP2      | Kost <i>et al.</i> , 1998 |
| p35S::FLC-GFP                             | XhoI/KpnI     | pGFP2      | Kost <i>et al.</i> , 1998 |
| pFLC::LUC                                 | NcoI/PstI     | pARR6::LUC | Hwang and Sheen 2001      |
| pFLC(m)::LUC                              | NcoI/PstI     | pARR6::LUC | Hwang and Sheen 2001      |
| p35S::ABF1-GFP                            | XhoI/KpnI     | pGFP2      | Kost <i>et al.</i> , 1998 |
| p35S::ABF3-GFP                            | XhoI/KpnI     | pGFP2      | Kost <i>et al.</i> , 1998 |
| p35S::ABF4-GFP                            | XhoI/KpnI     | pGFP2      | Kost <i>et al.</i> , 1998 |
| p35S::SnRK2.6                             | XmaI/SpeI     | p35S       | Kost <i>et al.</i> , 1998 |

Table S4

**Table S4. Primers for analyzing the enrichment of DNA fragments in ChIP assay.**

|      |                                                                      |
|------|----------------------------------------------------------------------|
| DNA1 | F: 5'-AATATCTGGCCCGACGAA-3'<br>R: 5'-ATTTGATCCTCAGGTTTGGG-3'         |
| DNA2 | F: 5'-TTGAAAGTCTTTGTAGGTTTGGTT-3'<br>R: 5'-CCCAAATCTTTGGCTACCAT-3'   |
| DNA3 | F: 5'-AAATGTTTGTGTGGCTCCAA-3'<br>R: 5'-CGATATTGGTGATTGGTATTAACCTT-3' |
| DNA4 | F: 5'-TTTGTGTTAATCTCCCGAACA-3'<br>R: 5'-GTGTTACCAAAGTCGTGCCTAC-3'    |
| DNA5 | F: 5'-AATATCTGGCCCGACGAA-3'<br>R: 5'-ATTTGATCCTCAGGTTTGGG-3'         |
| DNA6 | F: 5'-GCAATAGTTCAATCCGTATCGTA-3'<br>R: 5'-CCGGAGATACTAAGCGTT-3'      |

Table S5

**Table S5. Primer sequences of examined genes by qRT-PCR experiments.**

|                                  |                                                                       |
|----------------------------------|-----------------------------------------------------------------------|
| <i>ABI5</i>                      | F: 5'-GAAGAGAATGCGCAGCTAAA-3'<br>R: 5'-TTGTGCCCTTGACTTCAAAC-3'        |
| <i>FCA</i>                       | F: 5'-GTTCGAACGAGAGCAACAGA-3'<br>R: 5'-GCTGCTGAACTTGTGTGGT-3'         |
| <i>FT</i>                        | F: 5'-ATGGTGGATCCAGATGTTCC-3'<br>R: 5'-AGTGCACAAACCAATGGAGA-3'        |
| <i>FLC</i>                       | F: 5'-GGCGATAACCTGGTCAAGAT-3'<br>R: 5'-TTTGACTGATGATCCAAGGC-3'        |
| <i>SOC1</i>                      | F: 5'-CTCTTGGGAGAAGGCATAGG-3'<br>R: 5'-CACATACCTTTCTTGCTCGAAT-3'      |
| <i><math>\beta</math>-ACTIN8</i> | F: 5'-AGTGGTCGTACAACCGGTATTGT-3'<br>R: 5'-GAGGATAGCATGTGGAAGTGAGAA-3' |
